# Supplementary material
Source: publisher site journal article supplement (https://kjim.org/upload/media/kjim-2022-326-Supplementary-Table-1.pdf)
Supplement: Supplementary file 1 [file kjim-2022-326-Supplementary-Table-1.pdf]

**Supplementary Table 1. GDMT adequacy scores**

|                                       | Score |
|---------------------------------------|-------|
| Adequacy score type 1                 |       |
| ACEI or ARB                           | 1–3   |
| Beta-blockers (heart rate-based)      | 1–3   |
| MRA                                   | 2     |
| ARNI                                  | 3–5   |
| Maximum score 1                       | 10    |
| Adequacy score type 2                 |       |
| ACEI or ARB                           | 1–3   |
| Beta-blockers (dose based)            | 1–2   |
| MRA                                   | 2     |
| ARNI                                  | 3–5   |
| Maximum score 2                       | 9     |
| ARB                                   |       |
| Losartan dose (once daily)            |       |
| < 50 mg                               | 1     |
| 50–99 mg                              | 2     |
| ≥ 100 mg                              | 3     |
| Candesartan dose (once daily)         |       |
| < 8 mg                                | 1     |
| 8–15.9 mg                             | 2     |
| ≥ 16 mg                               | 3     |
| Valsartan dose (twice daily)          |       |
| < 80 mg                               | 1     |
| 80–159 mg                             | 2     |
| ≥ 160 mg                              | 3     |
| Fimasartan prescription (once daily)  | 1     |
| Telmisartan prescription (once daily) | 1     |
| Olmesartan prescription (once daily)  | 1     |
| ACEI                                  |       |
| Ramipril dose (twice daily)           |       |
| < 5 mg                                | 1     |
| 5–9.9 mg                              | 2     |
| ≥ 10 mg                               | 3     |
| Enalapril dose (twice daily)          |       |
| < 10 mg                               | 1     |
| 10–19.9 mg                            | 2     |
| ≥ 20 mg                               | 3     |
| Perindopril dose (once daily)         |       |
| < 2 mg                                | 1     |
| 2–4.9 mg                              | 2     |
| ≥ 5 mg                                | 3     |

**Supplementary Table 1. Continued**

|                                                            | Score |
|------------------------------------------------------------|-------|
| ARNI                                                       |       |
| ARNI dose (twice daily)                                    |       |
| < 50 mg                                                    | 3     |
| 50–99.9 mg                                                 | 4     |
| ≥ 100 mg                                                   | 5     |
| Beta-blockers (heart rate-based for type 1 adequacy score) |       |
| Heart rate/minute (sinus rhythm)                           |       |
| ≥ 80                                                       | 1     |
| 60–79                                                      | 2     |
| < 60                                                       | 3     |
| Heart rate/minute (atrial fibrillation)                    |       |
| ≥ 100                                                      | 1     |
| 80–99                                                      | 2     |
| < 80                                                       | 3     |
| Beta-blockers (dose-based for type 2 adequacy score)       |       |
| Beta-blockers                                              |       |
| None                                                       | 0     |
| < 50% target dose                                          | 1     |
| ≥ 50% target dose                                          | 2     |
| Bisoprolol                                                 |       |
| None                                                       | 0     |
| < 5 mg once daily                                          | 1     |
| ≥ 5 mg once daily                                          | 2     |
| Carvedilol                                                 |       |
| None                                                       | 0     |
| < 12.5 mg twice daily                                      | 1     |
| ≥ 12.5 mg twice daily                                      | 2     |
| Nebivolol                                                  |       |
| None                                                       | 0     |
| < 5 mg once daily                                          | 1     |
| ≥ 5 mg once daily                                          | 2     |

Modified from initial, median, and target dose based on 2021 ESC guidelines for the diagnosis and treatment of acute and chronic heart failure.

GDMT, guideline-directed medical therapy; ACEI, angiotensin-converting enzyme inhibitors; ARB, angiotensin-receptor blockers; MRA, mineralocorticoid-receptor-antagonists; ARNI, angiotensin receptor-neprilysin inhibitor.
